# Supplementary material for: Electronic structure and second-order nonlinear optical properties of lemniscular [16]cycloparaphenylene compounds
Source: Royal Society of Chemistry journal article supplement (doi:10.1039/d0ra01323d), 2020-01-01
Supplement: d0ra01323d1.pdf [file d0ra01323d1.pdf]

# Electronic structure and second-order nonlinear optical properties of lemniscular [16]cycloparaphenylene compounds

Li-jing Gong,<sup>\*‡</sup> Cheng Ma,<sup>‡</sup> Wan-feng Lin, Jin-kai Lv, and Xiang-yu Zhang

*Aviation University of Air Force, Changchun 130022, China*

## Contents

| Index                                                                                                                           | Page |
|---------------------------------------------------------------------------------------------------------------------------------|------|
| 1. The computed most intense absorption band ( $\lambda$ , nm) using the different basis sets level for compound <b>1</b> ..... | S2   |
| 2. The computed most intense absorption band ( $\lambda$ , nm) using the different functionals for compound <b>1</b> .....      | S2   |

**Table S1.** The computed most intense absorption band ( $\lambda$ , nm) using the B3LYP functional at the different basis sets level for compound **1** along with the experimental value.

| Basis set | 6-31G(d) | 6-31G(d,p) | 6-31+G(d) | 6-31+G(d,p) | exp |
|-----------|----------|------------|-----------|-------------|-----|
| $\lambda$ | 378.38   | 378.7      | 387.16    | 387.76      | 357 |

**Table S2.** The computed most intense absorption band ( $\lambda$ , nm) using the different functionals at 6-31G(d) basis set level for compound **1** along with the experimental value.

| Functional | B3LYP  | PBE0   | CAM-B3LYP | BH&HLYP | PBE0/CH <sub>2</sub> Cl <sub>2</sub> | Exp |
|------------|--------|--------|-----------|---------|--------------------------------------|-----|
| $\lambda$  | 378.38 | 362.67 | 319.03    | 323.26  | 368.49                               | 357 |
